# Supplementary material for: Where Does Honey Bee (Apis mellifera L.) Pollen Come from? A Study of Pollen Collected from Colonies at Ornamental Plant Nurseries
Source: MDPI journal article supplement (doi:10.3390/insects13080744), 2022-08-18
Supplement: s1 [file s1]

## Supplemental Figure S1

### Methods:

*Calculation of weight of pollen from each plant genus.* In 2018, pollen collected from each colony each week was weighed (which was not done in 2015), and varied widely (mean = 339 g, s.d. = 372 g, range 4.92 g to 1582 g). Assuming that pollen weight is proportional to volume [Odoux et al 2012], the proportion by volume and thus weight of each taxon was then applied to the total weight of the pollen collected from that hive and sample date, and summed over the samples from that hive over the season [35], which allowed us to calculate a profile of the pollen collected over the season. s.d. = standard deviation.

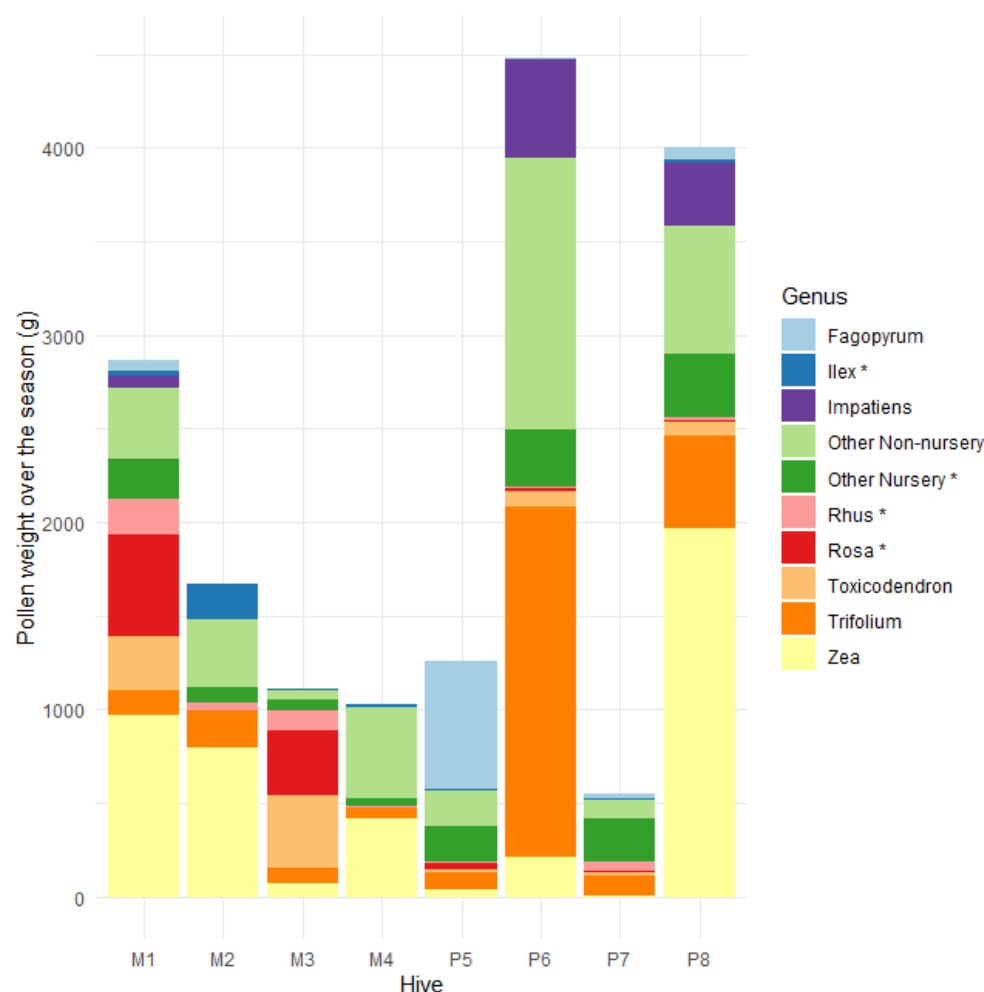

**Supplemental Figure S1.** Weight of trapped pollen by genus over the season for each hive in 2018. M = Monrovia Nursery, P = Prides Corner Farms, and the numbers represent the numbered hives at each site. \* Indicates plant genera grown at the nursery, and "Other Nursery\*" indicates the sum of all other genera grown at the nursery in addition to *Ilex*, *Rhus*, and *Rosa*. Likewise, "Other Non-nursery" indicates the sum of all genera not grown at the nursery in addition to those specifically graphed.

**Supplemental Table S1.** Weight of trapped pollen by genus over the season for each hive in 2018, as shown in Supplemental Fig. 1 classified by whether, or not the genus was grown at the nursery, and total and proportion of the weight of pollen from nursery or non-nursery genera.

|                         |                   | M1   | M2   | M3   | M4   | P5   | P6   | P7   | P8   | Total M | Total P |
|-------------------------|-------------------|------|------|------|------|------|------|------|------|---------|---------|
| Nursery Sources         |                   |      |      |      |      |      |      |      |      |         |         |
|                         | Ilex              | 25   | 191  | 7    | 16   | 7    | 1    | 9    | 18   | 237     | 35      |
|                         | Rhus              | 194  | 40   | 109  | 6    | 8    | 10   | 54   | 17   | 349     | 89      |
|                         | Rosa              | 542  | 0    | 348  | 2    | 37   | 19   | 4    | 13   | 892     | 73      |
|                         | Other Nursery     | 211  | 78   | 50   | 39   | 186  | 301  | 226  | 335  | 379     | 1048    |
| Total Nursery           |                   | 971  | 309  | 514  | 63   | 238  | 330  | 294  | 383  | 1857    | 1245    |
| Proportion from Nursery |                   | 0.34 | 0.19 | 0.46 | 0.06 | 0.19 | 0.07 | 0.54 | 0.10 | 0.28    | 0.12    |
| Non-Nursery Sources     |                   |      |      |      |      |      |      |      |      |         |         |
|                         | Fagopyrum         | 58   | 0    | 0    | 0    | 681  | 9    | 21   | 62   | 58      | 773     |
|                         | Impatiens         | 70   | 1    | 0    | 0    | 4    | 527  | 1    | 335  | 71      | 866     |
|                         | Toxicodendron     | 291  | 2    | 391  | 0    | 10   | 83   | 17   | 75   | 684     | 185     |
|                         | Trifolium         | 127  | 202  | 78   | 55   | 90   | 1872 | 108  | 490  | 462     | 2560    |
|                         | Zea               | 974  | 794  | 74   | 419  | 43   | 211  | 6    | 1969 | 2261    | 2229    |
|                         | Other Non-nursery | 375  | 362  | 57   | 488  | 193  | 1450 | 100  | 688  | 1281    | 2431    |
| Total Non-nursery       |                   | 1896 | 1360 | 599  | 962  | 1020 | 4152 | 253  | 3618 | 4817    | 9043    |
| Total Pollen            |                   | 2868 | 1669 | 1113 | 1025 | 1258 | 4482 | 547  | 4001 | 6674    | 10288   |

**Supplemental Table S2.** Weight (wt) of pollen collected by location, hive, and date, 2018.

| Monrovia Nursery |        |                        | Prides Corner Farms |        |                        |
|------------------|--------|------------------------|---------------------|--------|------------------------|
| Hive             | Date   | Wt of pollen collected | Hive                | Date   | Wt of pollen collected |
| 1                | 8-Jun  | 403.47                 | 6                   | 7-Jun  | 560.34                 |
| 3                | 8-Jun  | 460.26                 | 8                   | 7-Jun  | 88.62                  |
| 1                | 15-Jun | 771.8                  | 6                   | 14-Jun | 1582.48                |
| 3                | 15-Jun | 503.97                 | 8                   | 14-Jun | 923.27                 |
| 2                | 22-Jun | 84.87                  | 5                   | 21-Jun | 248.70                 |
| 2                | 29-Jun | 408.13                 | 7                   | 21-Jun | 222.21                 |
| 4                | 29-Jun | 66.03                  | 5                   | 27-Jun | 106.01                 |
| 1                | 6-Jul  | 153.26                 | 7                   | 27-Jun | 263.89                 |
| 3                | 6-Jul  | 36.88                  | 6                   | 5-Jul  | 16.59                  |
| 1                | 13-Jul | 54.96                  | 8                   | 5-Jul  | 92.81                  |
| 3                | 13-Jul | 21.07                  | 6                   | 12-Jul | 4.92                   |
| 2                | 20-Jul | 159.09                 | 8                   | 12-Jul | 108.37                 |
| 4                | 20-Jul | 59.67                  | 5                   | 19-Jul | 387.62                 |
| 2                | 27-Jul | 540.01                 | 7                   | 19-Jul | 21.30                  |
| 4                | 27-Jul | 257.1                  | 5                   | 26-Jul | 355.60                 |
| 1                | 3-Aug  | 55.29                  | 7                   | 26-Jul | 8.39                   |
| 1                | 10-Aug | 957.8                  | 6                   | 2-Aug  | 121.39                 |
| 3                | 10-Aug | 90.55                  | 8                   | 2-Aug  | 523.20                 |
| 2                | 17-Aug | 172.12                 | 6                   | 9-Aug  | 161.12                 |
| 4                | 17-Aug | 128.02                 | 8                   | 9-Aug  | 1495.53                |
| 2                | 24-Aug | 305.06                 | 5                   | 23-Aug | 166.92                 |
| 4                | 24-Aug | 513.84                 | 7                   | 23-Aug | 31.95                  |
| 1                | 31-Aug | 199.57                 | 6                   | 30-Aug | 792.78                 |
| 1                | 6-Sep  | 271.29                 | 8                   | 30-Aug | 160.85                 |
|                  |        |                        | 6                   | 6-Sep  | 1219.32                |
|                  |        |                        | 8                   | 6-Sep  | 608.21                 |
